# Supplementary material
Source: Springer Nature journal article supplement (https://www.springerprofessional.de/resource/supplementary/13673_2012_41_MOESM2_ESM.pdf/11899370)
Supplement: MOESM2 [file 11899370]

Registration Phase – User registers

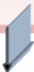

Login Phase – User login for grid resource access/sharing

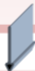

Mutual Authentication – Both user and server authenticate each other
